# Supplementary material for: Effect of Anti-cancerous Compounds on Cancer Cells Extracted From Edible Mushrooms: A Review
Source: Preprints.org preprint supplement (doi:10.20944/preprints202109.0341.v1), 2021-09-20
Supplement: Supplementary file 2 [file supplementary]

**Total Number of Figures- 2**

**Total number of Chemical Structures-9**


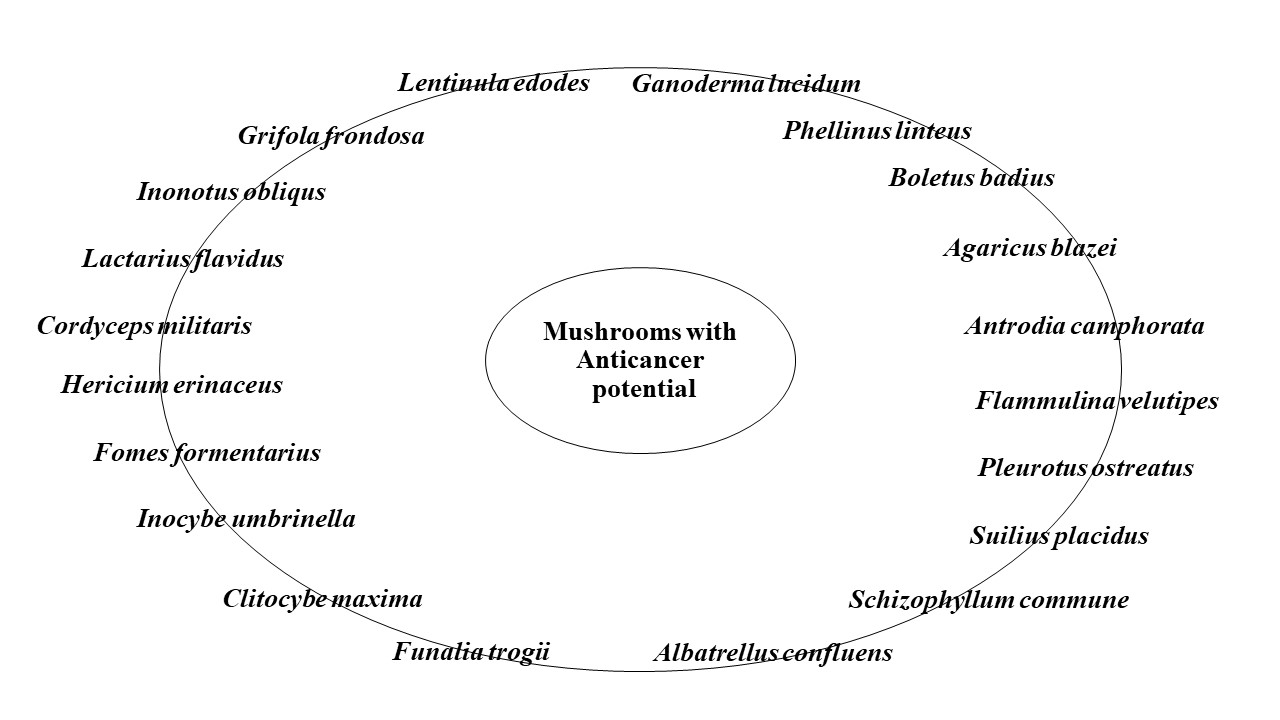


**Figure 1: Medicinal mushrooms with anti-cancerous properties**

**Structure 1: Theanine Structure 2: Hispolon Structure 3: Illudin-S**
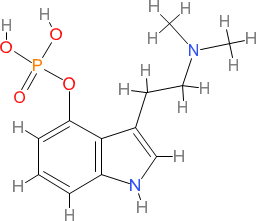


**Structure 4: Psilocybin** **Structure 5: Gannoderric acid Structure 6: Cordycepin**

***Structure 7: Grifolin Structure 8: Antroquinonol* *Structure 9: Lentinan***

*
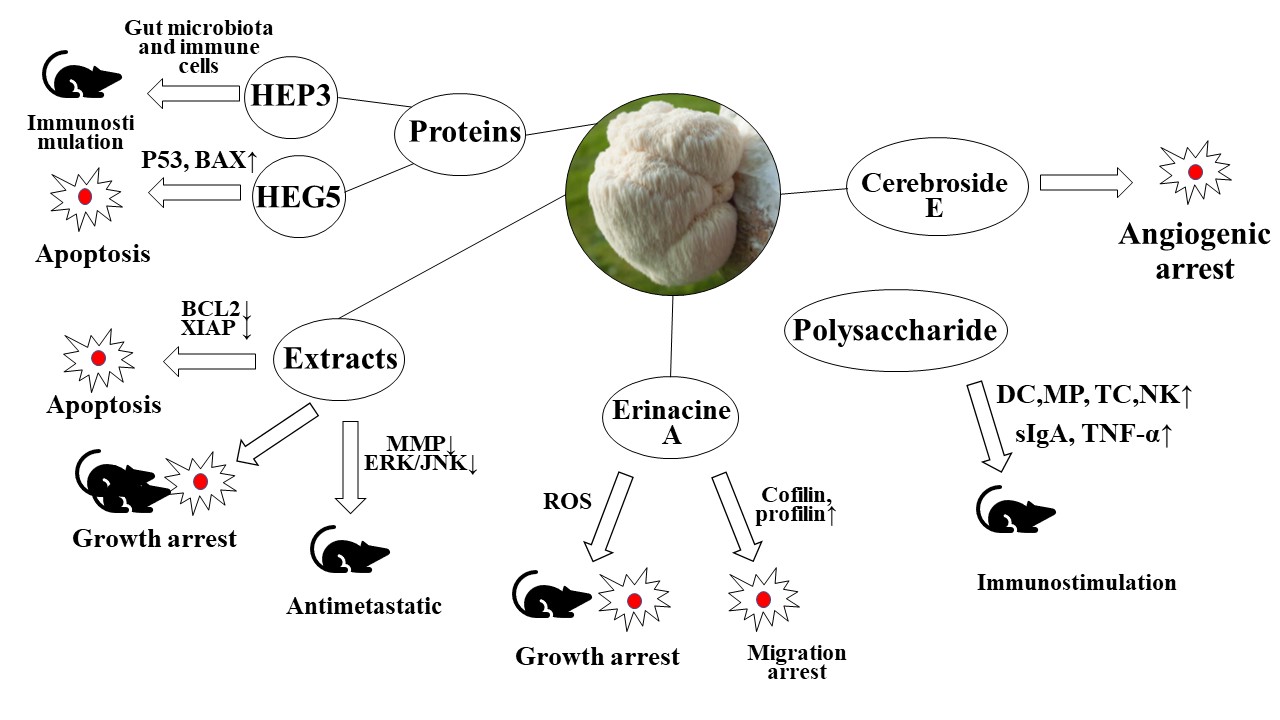
*

**Figure 2: The anti-cancer properties of Hericium erinaceus**
